# Supplementary material for: Patterned Colouring via Variable-Speed Single Stretching
Source: MDPI journal article supplement (doi:10.3390/inventions7040093), 2022-10-12
Supplement: s1 [file s1]

Archive with 1 entries (1 files):
- inventions-1921382-supplementary.pdf
